## P3451

## Female gender is an independent predictor of one-year mortality following primary angioplasty for ST-segment elevation myocardial infarction, regardless of age, clinical severity and frailty

M.C. Viana-Llamas<sup>1</sup>, A. Silva-Obregon<sup>2</sup>, R. Arroyo Espliguero<sup>1</sup>, A. Estrella-Alonso<sup>2</sup>, S. Saboya-Sanchez<sup>3</sup>, G. Uribe-Heredia<sup>1</sup>, B. Garcia-Magallon<sup>1</sup>, C. Toran-Martinez<sup>1</sup>, A. Castillo-Sandoval<sup>1</sup>, Z. Eguileor-Marin<sup>2</sup>, N. Arriero-Fernandez<sup>2</sup>, C. Marian-Crespo<sup>2</sup>

<sup>1</sup>University Hospital, Cardiology, Guadalajara, Spain; <sup>2</sup>University Hospital of Guadalajara, Intensive Care Unit., Guadalajara, Spain; <sup>3</sup>University Hospital Puerta de Hierro Majadahonda, Intensive Care Unit, Madrid, Spain

**Background:** Gender-based differences in mortality of patients with ST-segment elevation myocardial infarction (STEMI) have been reported. However, controversy exists about the impact of female gender on mortality after correcting for baseline risk differences.

**Purpose:** Assess gender-based mortality in a cohort of STEMI patients following primary angioplasty.

**Methods:** Retrospective cohort of 427 consecutive STEMI patients (64 years [55–75]; 78% men) admitted to a general ICU between November-2013 and February-2017. We used Kaplan-Meier and Cox regression models for survival analysis. The Clinical Frailty Scale (CFS) was used to assess frailty.

**Results:** Women were older and had a higher GRACE 2.0 and frailty

(CFS $\geq$ 4). Women had lower creatine-phosphokinase and albumin levels and higher B-natriuretic peptide levels, despite the lack of gender-based differences in left ventricular ejection fraction (LVEF) and MI size and location. One-year mortality rate was higher in women, most often from cardiogenic shock during admission and at 30-day follow-up (Table). After Cox regression analysis, women had a 2.23-fold higher risk of one-year mortality compared with men (Figure), independently of age, frailty, GRACE 2.0, LVEF and inotropic agents requirements.

**Conclusions:** Female gender is an independent predictor of one-year mortality in STEMI patients, regardless of age, clinical severity and frailty. A potential myocardial dysfunction probably mediated by an increased frailty, may play a role in the high mortality rate among women after STEMI.

| Baseline characteristics               | Women (n=93)        | Men (n=334)         | P value |
|----------------------------------------|---------------------|---------------------|---------|
| One-year mortality, n (%)              | 15 (16.1)           | 15 (4.5)            | <0.001  |
| Cardiogenic shock, n (%)               | 10 (62.5)           | 6 (37.5)            | <0.001  |
| Age (years)                            | 70.8 [51.2–80.3]    | 61.9 [54.2–71.8]    | <0.001  |
| Hypertension, n (%)                    | 54 (58.1)           | 149 (44.6)          | 0.022   |
| GRACE 2.0                              | 129 [104.5–156]     | 112 [94–139]        | 0.001   |
| Clinical Frailty Scale $\geq$ 4, n (%) | 28 (30.1)           | 32 (9.6)            | <0.001  |
| MI location (anterior), n (%)          | 42 (45.2)           | 152 (45.5)          | 0.953   |
| Creatin-phosphokinase (U/L)            | 1040 [300.5–2134]   | 1517 [620.5–2852.8] | 0.004   |
| High-sensitivity troponin I (pg/mL)    | 4003 [62.1–48526.6] | 9070 [65.8–65893]   | 0.473   |
| Left ventricular ejection fraction (%) | 52 [40–60]          | 55 [45–60]          | 0.465   |
| B-natriuretic peptide (pg/mL)          | 241.1 [99.9–896.9]  | 103.6 [28.3–259.2]  | <0.001  |
| Albumin (g/L)                          | 36.1 [34.3–38.5]    | 38.4 [35.6–40.5]    | <0.001  |
| Inotropic agents, n (%)                | 14 (15.1)           | 26 (7.8)            | 0.033   |

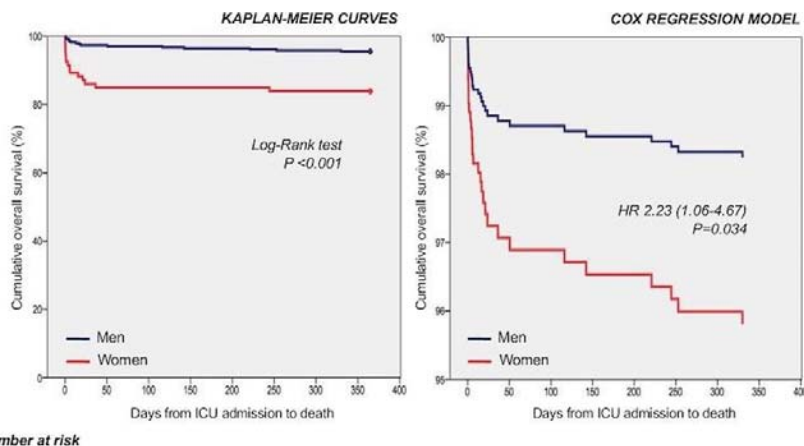

Kaplan-Meier and Cox survival curves.
